# Supplementary material for: Immigrant women’s and families’ views and experiences of routine postnatal care: findings from a qualitative evidence synthesis
Source: PubMed Central journal article supplement — BMJ Glob Health. 2024 Feb 13;8(Suppl 2):e014075. doi: 10.1136/bmjgh-2023-014075 (PMC10897958; doi:10.1136/bmjgh-2023-014075), 2024-02-13
Supplement: bmjgh-2023-014075supp001.pdf [file bmjgh-2023-014075supp001.pdf]

**Supplementary table 1. Inclusion and exclusion criteria**

| <b>Inclusion criteria for primary review</b>                                                                                                                                                                                                                                                                                                                                                                                                                                                                                                                                                                                                                                                                                                                                                   | <b>Exclusion criteria for primary review</b>                                                                                                                                                                                                                                                                                                                                                                                                                                                                                                                                                                                                                                                                                                                                                                                                                               | <b>Additional inclusion/exclusion criteria for the current analysis on immigrant women's and families' views on routine postnatal care</b>                                                                                                                                                                                                                                                                                                                                                                                                              |
|------------------------------------------------------------------------------------------------------------------------------------------------------------------------------------------------------------------------------------------------------------------------------------------------------------------------------------------------------------------------------------------------------------------------------------------------------------------------------------------------------------------------------------------------------------------------------------------------------------------------------------------------------------------------------------------------------------------------------------------------------------------------------------------------|----------------------------------------------------------------------------------------------------------------------------------------------------------------------------------------------------------------------------------------------------------------------------------------------------------------------------------------------------------------------------------------------------------------------------------------------------------------------------------------------------------------------------------------------------------------------------------------------------------------------------------------------------------------------------------------------------------------------------------------------------------------------------------------------------------------------------------------------------------------------------|---------------------------------------------------------------------------------------------------------------------------------------------------------------------------------------------------------------------------------------------------------------------------------------------------------------------------------------------------------------------------------------------------------------------------------------------------------------------------------------------------------------------------------------------------------|
| <ul style="list-style-type: none"> <li>• Studies including healthy women, who were considered to be healthy in the postnatal period, and who have had a healthy newborn as well as fathers, partners and other family members</li> <li>• Studies where at least some of the extractable data are women's, and/or fathers/partners/and other family members' own accounts of their views and experiences of the nature of, provision of, and/or seeking of postnatal care after birth, irrespective of parity, mode of birth or place of birth</li> <li>• Studies involving postnatal care experiences with or without interaction with the health system (home-based, community-based care, care by family members)</li> <li>• Studies from high-, middle- and low-income countries</li> </ul> | <ul style="list-style-type: none"> <li>• Studies reporting on views/experiences of, or access to, maternity services generally with no specific data on postnatal care</li> <li>• Women with known complications/health conditions (e.g., depression), or after severe morbidity (e.g., near-miss)</li> <li>• Services for specific conditions (e.g., HIV), or high-risk populations (e.g., multiples, preterm, low birth weight, malformations)</li> <li>• Specific interventions for a singular condition (e.g., breastfeeding support, family planning, mental health) or postnatal education only (e.g., parenting education)</li> <li>• Studies related to care of postnatal complications or intensive care for women or newborns</li> <li>• Mixed-methods studies reporting qualitative data without using a recognized qualitative approach to analysis</li> </ul> | <p><i>Inclusion</i></p> <ul style="list-style-type: none"> <li>• Studies including immigrant women's first-hand accounts (not reported through a third party)</li> <li>• Studies focused on immigrant women's &amp; other family members' (including fathers/partners) views of postnatal care</li> </ul> <p><i>Exclusion</i></p> <ul style="list-style-type: none"> <li>• Studies focused on women living in refugee or internally displaced persons camps</li> <li>• Studies focused on families migrating seasonally within their country</li> </ul> |

Supplementary tables for paper by Sacks & Brizuela et al. *Immigrant women's and families' views and experiences of routine postnatal care: findings from a Qualitative Evidence Synthesis.*

|  |                                                                                                                                                                                                   |  |
|--|---------------------------------------------------------------------------------------------------------------------------------------------------------------------------------------------------|--|
|  | <ul style="list-style-type: none"><li>• Case studies, conference abstracts and unpublished PhD or Master's theses</li><li>• Systematic reviews (although reference lists were reviewed)</li></ul> |  |
|--|---------------------------------------------------------------------------------------------------------------------------------------------------------------------------------------------------|--|

Supplementary tables for paper by Sacks & Brizuela et al. *Immigrant women's and families' views and experiences of routine postnatal care: findings from a Qualitative Evidence Synthesis.*

**Supplementary table 2. Characteristics of included Studies, alphabetical by study first author (n=44)**

| Author(s) and Study                                                                                                                                | Year | Country (income level) | Setting (urban/rural) health facility/ community/home | Research Design   | Participants                                                               | Definition of Immigrant                                                | Migrating from                                                                | Quality rating |
|----------------------------------------------------------------------------------------------------------------------------------------------------|------|------------------------|-------------------------------------------------------|-------------------|----------------------------------------------------------------------------|------------------------------------------------------------------------|-------------------------------------------------------------------------------|----------------|
| Akhavan et al [26]. Foreign-born women's experiences of Community-Based Doulas in Sweden--a qualitative study.                                     | 2012 | Sweden (high)          | Not specified; facility                               | Descriptive study | 10 mothers                                                                 | Either newly arrived refugees or women who had come to Sweden to marry | Azerbaijan, Iraq, Morocco, Somalia, Tunisia, Turkey, Yemen                    | B              |
| Almeida et al [27]. Migrant women's perceptions of healthcare during pregnancy and early motherhood: addressing the social determinants of health. | 2014 | Portugal (high)        | Urban; community                                      | Descriptive study | 25 recent mothers and six native-Portuguese women of equal economic status | Immigrant women                                                        | Portuguese-speaking African countries, Brazil, and Eastern European countries | C              |
| Alshawish et al [28]. Investigating access to and use of maternity health-care services in the UK by Palestinian women                             | 2013 | UK (high)              | Not defined; Home and facility                        | Descriptive study | 22 mothers                                                                 | Not specified                                                          | Palestine                                                                     | C              |
| Chang et al [29]. Experiences of Chinese immigrant women following "Zuo Yue Zi" in British Columbia                                                | 2017 | Canada (high)          | Urban; home                                           | Descriptive Study | 13 mothers                                                                 | Immigrant women                                                        | Mainland China, Taiwan                                                        | B              |
| Chu [30]. Postnatal experience and                                                                                                                 | 2005 | Australia (high)       | Urban; community and home                             | Descriptive study | 30 women and over 25                                                       | Migrated due to husband's                                              | China, Hong Kong, Taiwan                                                      | C              |

Supplementary tables for paper by Sacks & Brizuela et al. *Immigrant women's and families' views and experiences of routine postnatal care: findings from a Qualitative Evidence Synthesis.*

|                                                                                                                                                |      |                    |                           |                    |                |                                                                                                                                              |                |   |
|------------------------------------------------------------------------------------------------------------------------------------------------|------|--------------------|---------------------------|--------------------|----------------|----------------------------------------------------------------------------------------------------------------------------------------------|----------------|---|
| health needs of Chinese migrant women in Brisbane, Australia                                                                                   |      |                    |                           |                    | key informants | studies, their own studies, with the business migration scheme, with the family reunion scheme, and with other technical or business schemes |                |   |
| Crowther et al [31]. Migrant Polish women overcoming communication challenges in Scottish maternity services: A qualitative descriptive study. | 2019 | UK (high)          | Urban; Facility           | Descriptive study  | 9 mothers      | Not specified                                                                                                                                | Poland         | B |
| Davies et al [32]. The maternity information concerns of Somali women in the United Kingdom.                                                   | 2001 | UK (high)          | Urban; Facility           | Descriptive study  | 13 mothers     | Not specified                                                                                                                                | Somalia        | C |
| Davis [10]. The postpartum experience for southeast Asian women in the United States.                                                          | 2001 | USA (high)         | Urban; Community          | Phenomenology      | 19 mothers     | Refugees or immigrants                                                                                                                       | Southeast Asia | B |
| DeSouza [33]. Transforming possibilities of care: Goan migrant motherhood in New Zealand.                                                      | 2005 | New Zealand (high) | Urban; community and home | Ethnographic study | 7 mothers      | Immigrant women                                                                                                                              | India          | B |
| Doering et al [34]. Experience of the New Zealand maternity care system by a group of Japanese                                                 | 2015 | New Zealand (high) | Not specified; facility   | Descriptive study  | 13 mothers     | Immigrant women                                                                                                                              | Japan          | B |

Supplementary tables for paper by Sacks & Brizuela et al. *Immigrant women's and families' views and experiences of routine postnatal care: findings from a Qualitative Evidence Synthesis.*

|                                                                                                                                                                                   |      |               |                               |                                |                                                                    |                                                                                                                                                                                                 |                                                                                                 |   |
|-----------------------------------------------------------------------------------------------------------------------------------------------------------------------------------|------|---------------|-------------------------------|--------------------------------|--------------------------------------------------------------------|-------------------------------------------------------------------------------------------------------------------------------------------------------------------------------------------------|-------------------------------------------------------------------------------------------------|---|
| women in one centre.                                                                                                                                                              |      |               |                               |                                |                                                                    |                                                                                                                                                                                                 |                                                                                                 |   |
| Grewal et al [35]. Perinatal beliefs and practices of immigrant Punjabi women living in Canada.                                                                                   | 2008 | Canada (high) | Urban; community              | Naturalistic descriptive study | 15 mothers and 5 healthcare professionals and community leaders    | Immigrant women                                                                                                                                                                                 | India                                                                                           | B |
| Gurman et al [36]. Factors affecting Latina immigrants' perceptions of maternal health care: findings from a qualitative study.                                                   | 2008 | USA (high)    | Urban; Facility               | Descriptive study              | 13 women                                                           | Immigrant women                                                                                                                                                                                 | Dominican Republic, El Salvador, Honduras, Peru                                                 | B |
| Higginbottom et al [37]. "I have to do what I believe": Sudanese women's beliefs and resistance to hegemonic practices at home and during experiences of maternity care in Canada | 2013 | Canada (high) | Urban; community              | Focused Ethnographic Study     | 12 women                                                           | Immigrant women                                                                                                                                                                                 | Sudan                                                                                           | B |
| Higginbottom et al [38]. An ethnographic study of communication challenges in maternity care for immigrant women in rural Alberta. Midwifery                                      | 2015 | Canada (high) | Rural; community and facility | Focused ethnographic research  | 12 women, 13 health care providers, and 6 social service providers | Target population was heterogeneous and may have included economic migrants and skilled workers, temporary foreign workers, documented and undocumented residents, refugee claimants, refugees, | Canada, Congo, Eritrea, Ethiopia, Mauritania, Pakistan, Peru, Philippines, South Africa, Uganda | C |

Supplementary tables for paper by Sacks & Brizuela et al. *Immigrant women's and families' views and experiences of routine postnatal care: findings from a Qualitative Evidence Synthesis.*

|                                                                                                                                                 |      |                  |                                         |                            |                                                              |                                                                                                                                                                                                                              |                                                                                       |   |
|-------------------------------------------------------------------------------------------------------------------------------------------------|------|------------------|-----------------------------------------|----------------------------|--------------------------------------------------------------|------------------------------------------------------------------------------------------------------------------------------------------------------------------------------------------------------------------------------|---------------------------------------------------------------------------------------|---|
|                                                                                                                                                 |      |                  |                                         |                            |                                                              | asylum seekers, and students                                                                                                                                                                                                 |                                                                                       |   |
| Higginbottom et al [39]. An ethnographic investigation of the maternity healthcare experience of immigrants in rural and urban Alberta, Canada. | 2016 | Canada (high)    | Urban and rural; Community and facility | Focused ethnographic study | 33 women who had used maternity services in the past 2 years | Target population was heterogeneous and may have included economic migrants and skilled workers, temporary foreign workers, documented and undocumented residents, refugee claimants, refugees, asylum seekers, and students | Eritrea, China, Colombia, India, Mauritania, Pakistan, Philippines, Sudan, Tajikistan | C |
| Hill et al [40]. Somali immigrant women's health care experiences and beliefs regarding pregnancy and birth in the United States.               | 2012 | USA (high)       | Urban; Facility                         | Descriptive study          | 18 women                                                     | Immigrant women                                                                                                                                                                                                              | Somalia                                                                               | B |
| Hoban et al [41]. Cambodian migrant women's postpartum experiences in Victoria, Australia.                                                      | 2013 | Australia (high) | Sub-urban; home                         | Ethnographic study         | 20 mothers                                                   | 16 women on a spouse visa, one on a student visa, and three women who migrated with their family as teenagers                                                                                                                | Cambodia                                                                              | B |
| Hoang et al [11]. Having a baby in the new land: a qualitative exploration of                                                                   | 2009 | Australia (high) | Rural; community and home               | Grounded Theory study      | 10 mothers                                                   | Immigrant women                                                                                                                                                                                                              | China, Japan, Korea, Philippines, Vietnam                                             | C |

Supplementary tables for paper by Sacks & Brizuela et al. *Immigrant women's and families' views and experiences of routine postnatal care: findings from a Qualitative Evidence Synthesis.*

|                                                                                                                                     |      |                    |                          |                                            |                                                                                                                                    |                                                                                                                                                                                                                                                                       |                                      |   |
|-------------------------------------------------------------------------------------------------------------------------------------|------|--------------------|--------------------------|--------------------------------------------|------------------------------------------------------------------------------------------------------------------------------------|-----------------------------------------------------------------------------------------------------------------------------------------------------------------------------------------------------------------------------------------------------------------------|--------------------------------------|---|
| the experiences of Asian migrants in rural Tasmania, Australia.                                                                     |      |                    |                          |                                            |                                                                                                                                    |                                                                                                                                                                                                                                                                       |                                      |   |
| Lam et al [42]. A qualitative study of the postpartum experience of Chinese women living in England.                                | 2012 | UK (high)          | Urban; Home and facility | Constructivist grounded theory methodology | 8 women                                                                                                                            | Immigrant women                                                                                                                                                                                                                                                       | China                                | B |
| Kim et al [43]. Healthcare access challenges facing six African refugee mothers in South Korea: a qualitative multiple-case study.  | 2017 | South Korea (high) | Urban; facility          | Descriptive study                          | 6 African refugee mothers aged 25–39 years who had delivered at least one of their children in Korea within 5 years of recruitment | Four participants had been denied official refugee status by the Korean Government but were approved as humanitarian status holders (G-1-6 visa). Two women were legally approved as refugees (F-2-4 visa) but one of them was undocumented at the time of childbirth | Ethiopia, Ivory Coast, Liberia, Mali | B |
| Lee et al [44]. A descriptive phenomenology study of newcomers' experience of maternity care services: Chinese women's perspectives | 2014 | Canada (high)      | Urban; Community         | Descriptive phenomenology study            | 15 women who gave birth within the last two to six months                                                                          | Immigrant women; immigrated within the last 10 years                                                                                                                                                                                                                  | China, Hong Kong, Taiwan             | B |
| McLeish [45]. Maternity experiences of asylum seekers in England.                                                                   | 2005 | UK (high)          | Urban; facility and home | Descriptive study                          | 33 women                                                                                                                           | Asylum seekers                                                                                                                                                                                                                                                        | 19 countries                         | B |

Supplementary tables for paper by Sacks & Brizuela et al. *Immigrant women's and families' views and experiences of routine postnatal care: findings from a Qualitative Evidence Synthesis.*

|                                                                                                                                                                                                                               |      |                         |                                                |                   |                                                                                                                                                                   |                                                                                                           |                                                                                   |   |
|-------------------------------------------------------------------------------------------------------------------------------------------------------------------------------------------------------------------------------|------|-------------------------|------------------------------------------------|-------------------|-------------------------------------------------------------------------------------------------------------------------------------------------------------------|-----------------------------------------------------------------------------------------------------------|-----------------------------------------------------------------------------------|---|
| McFadden et al [46]. Does cultural context make a difference to women's experiences of maternity care? A qualitative study comparing the perspectives of breast-feeding women of Bangladeshi origin and health practitioners. | 2012 | UK (high)               | Not specified; facility and community          | Descriptive study | 23 women, 4 health service managers, and 28 health practitioners                                                                                                  | Not specified                                                                                             | Bangladesh                                                                        | B |
| Origlia Ikhilior et al [47]. Communication barriers in maternity care of allophone migrants: Experiences of women, healthcare professionals, and intercultural interpreters.                                                  | 2019 | Switzerland (high)      | Not specified; facility                        | Descriptive study | 10 women, 22 healthcare professionals, and four intercultural interpreters who participated in three focus group discussions and seven semi-structured interviews | Two provisionally admitted foreigners, one settled foreign national, and seven resident foreign nationals | Albania, Eritrea, Kosovo                                                          | B |
| Phanwichatkul et al [48]. Migrant Burmese women living in southern Thailand and motherhood: An ethnographic study.                                                                                                            | 2019 | Thailand (upper middle) | Rural; facility                                | Ethnography       | 10 women                                                                                                                                                          | Burmese migrant women                                                                                     | Myanmar (Burma)                                                                   | B |
| Phillimore [49]. Delivering maternity services in an era of superdiversity: the challenges of novelty and newness                                                                                                             | 2015 | UK (high)               | Urban and rural; Facility, community, and home | Descriptive study | 82 respondents                                                                                                                                                    | Refugees, spousal migrants, asylum seekers, failed asylum seekers, A8 migrants,                           | 28 different countries, high proportions of Chinese, Polish, and African Migrants | B |

Supplementary tables for paper by Sacks & Brizuela et al. *Immigrant women's and families' views and experiences of routine postnatal care: findings from a Qualitative Evidence Synthesis.*



|                                                                                                                                                                      |      |                  |                                |                    |                                                                                          |                                                                                                   |                                                                                               |   |
|----------------------------------------------------------------------------------------------------------------------------------------------------------------------|------|------------------|--------------------------------|--------------------|------------------------------------------------------------------------------------------|---------------------------------------------------------------------------------------------------|-----------------------------------------------------------------------------------------------|---|
|                                                                                                                                                                      |      |                  |                                |                    |                                                                                          | undocumented                                                                                      |                                                                                               |   |
| Qureshi et al [50]. Ethnographic study of experiences of Pakistani women immigrants with pregnancy, birthing, and postpartum care in the United States and Pakistan. | 2013 | USA (high)       | Urban; Facility                | Ethnographic study | 26 women                                                                                 | Immigrant women                                                                                   | Pakistan                                                                                      | C |
| Reitmanova et al [51]. "They Can't Understand It": Maternity Health and Care Needs of Immigrant Muslim Women in St. John's, Newfoundland                             | 2008 | Canada (high)    | Urban, Facility and home       | Descriptive study  | 6 women who delivered at least one of their children in St. John's between 1995 and 2005 | Immigrant women (English speaking)                                                                | 5 countries (unnamed)                                                                         | C |
| Renzaho et al [52]. Closing the gap in maternal and child health: a qualitative study examining health needs of migrant mothers in Dandenong, Victoria, Australia.   | 2014 | Australia (high) | Sub-urban and urban; community | Descriptive study  | 35 mothers                                                                               | Immigrant mothers                                                                                 | Afghanistan, Africa (countries not specified), China, Iran, Jordan, Lebanon, Palestine, Syria | B |
| Rice [53]. Nyo dua hli--30 days confinement: traditions and changed childbearing beliefs and practices among Hmong women in Australia.                               | 2000 | Australia (high) | Urban; home                    | Ethnographic study | 27 mothers                                                                               | Refugees from Southeast Asia and who have migrated to Australia since 1975, particularly recently | Laos                                                                                          | A |

Supplementary tables for paper by Sacks & Brizuela et al. *Immigrant women's and families' views and experiences of routine postnatal care: findings from a Qualitative Evidence Synthesis.*

|                                                                                                                                                                                  |      |                    |                                |                   |                                                                                  |                                                                                                                                                                                                                              |                                                                                        |   |
|----------------------------------------------------------------------------------------------------------------------------------------------------------------------------------|------|--------------------|--------------------------------|-------------------|----------------------------------------------------------------------------------|------------------------------------------------------------------------------------------------------------------------------------------------------------------------------------------------------------------------------|----------------------------------------------------------------------------------------|---|
| Riggs et al [54]. Accessing maternal and child health services in Melbourne, Australia: reflections from refugee families and service providers.                                 | 2012 | Australia (high)   | Sub-urban and urban; community | Descriptive study | 87 mothers and 18 MCH nurses, other healthcare providers, and bicultural workers | Refugee background                                                                                                                                                                                                           | Assyrian Chaldean, Bhutanese backgrounds, Iraq, Karen, Lebanese, South Sudanese        | B |
| Riggs et al [55]. Fatherhood in a New Country: A Qualitative Study Exploring the Experiences of Afghan Men and Implications for Health Services                                  | 2016 | Australia (high)   | Sub-urban; facility            | Descriptive study | 14 men, 16 women, and 34 health professionals                                    | Refugee background                                                                                                                                                                                                           | Afghanistan                                                                            | B |
| Sami et al [56]. Giving birth in Switzerland: a qualitative study exploring migrant women's experiences during pregnancy and childbirth in Geneva and Zurich using focus groups. | 2019 | Switzerland (high) | Urban; facility                | Descriptive study | 33 mothers                                                                       | Migrated for one or more of the following reasons: Woman had left her country involuntarily either due to war, conflict or economic pressure. Woman lived in Switzerland without a legal status. Woman had recently arrived. | Bangladesh, Bolivia, Brazil, Dominican Republic, Eritrea, Germany, Peru, Portugal, USA | A |
| Shafiei et al [57]. Women's views and experiences of maternity care: a study of immigrant Afghan women in Melbourne, Australia.                                                  | 2012 | Australia (high)   | Urban; facility                | Descriptive study | 10 mothers                                                                       | Immigrant women with refugee background                                                                                                                                                                                      | Afghanistan                                                                            | B |

Supplementary tables for paper by Sacks & Brizuela et al. *Immigrant women's and families' views and experiences of routine postnatal care: findings from a Qualitative Evidence Synthesis.*

|                                                                                                                                                                                                |      |                  |                         |                     |                                                           |                                                                                                                                                           |                                       |   |
|------------------------------------------------------------------------------------------------------------------------------------------------------------------------------------------------|------|------------------|-------------------------|---------------------|-----------------------------------------------------------|-----------------------------------------------------------------------------------------------------------------------------------------------------------|---------------------------------------|---|
| Shafiei et al [58]. Immigrant Afghan women's emotional well-being after birth and use of health services in Melbourne, Australia.                                                              | 2015 | Australia (high) | Urban; facility         | Descriptive study   | 10 mothers                                                | Immigrant women with refugee background                                                                                                                   | Afghanistan                           | B |
| Skoog et al [59]. 'Happy that someone cared'- Non-native-speaking immigrant mothers' experiences of participating in screening for postpartum depression in the Swedish child health services. | 2019 | Sweden (high)    | Not specified; facility | Descriptive study   | 13 mothers                                                | Twelve mothers had received a residence permit, one was seeking asylum, seven were refugees because of war, five family immigrants, one political refugee | Iraq, Kosovo, Kurdistan, Libya, Syria | B |
| Stewart et al [60]. Social support needs of Sudanese and Zimbabwean refugee new parents in Canada.                                                                                             | 2017 | Canada (high)    | Urban; Community        | Descriptive study   | 72 new parents, 15 service providers, and 15 policymakers | Refugee claims accepted (convention refugees) and refugee claimants                                                                                       | Sudan, Zimbabwe                       | B |
| Ta Park et al [61]. Postpartum Traditions, Mental Health, and Help-Seeking Considerations Among Vietnamese American Women: a Mixed-Methods Pilot Study.                                        | 2017 | USA (high)       | Urban; Home             | Mixed methods study | 12 women                                                  | Immigrant women                                                                                                                                           | Vietnam                               | C |
| Taniguchi et al [62]. Childbirth overseas: the experience of Japanese women in Hawaii.                                                                                                         | 2007 | USA (high)       | Not specified; Facility | Descriptive study   | 35 primiparas and 10 multiparas                           | Immigrant women                                                                                                                                           | Japan                                 | C |

Supplementary tables for paper by Sacks & Brizuela et al. *Immigrant women's and families' views and experiences of routine postnatal care: findings from a Qualitative Evidence Synthesis.*

|                                                                                                                       |      |                  |                                  |                                      |                                                                                          |                                                                                                                                                                       |                                                                                                      |   |
|-----------------------------------------------------------------------------------------------------------------------|------|------------------|----------------------------------|--------------------------------------|------------------------------------------------------------------------------------------|-----------------------------------------------------------------------------------------------------------------------------------------------------------------------|------------------------------------------------------------------------------------------------------|---|
| Waugh [63]. Beliefs associated with Mexican immigrant families' practice of la cuarentena during postpartum recovery. | 2011 | USA (high)       | Not specified; Home and facility | Ethnography                          | 23 new mothers, 5 female caregivers, 7 male partners, 5 bicultural expert key informants | Immigrant women                                                                                                                                                       | Mexico                                                                                               | C |
| Wikberg et al [64]. Intercultural caring from the perspectives of immigrant new mothers.                              | 2012 | Finland (high)   | Not specified; facility          | Descriptive interpretive ethnography | 17 mothers                                                                               | Two quota refugees, seven migrated for own or husband's work, two for husband's study, and six for family reasons, of which one was an asylum seeker entitled to stay | Australia, Bosnia, Burma, Colombia, Estonia, Hungary, India, Iraq, Russia, Thailand, Uganda, Vietnam | A |
| Wikberg et al [65]. Immigrant New Mothers in Finnish Maternity Care: An Ethnographic Study of Caring.                 | 2014 | Finland (high)   | Not specified; facility          | Descriptive interpretive ethnography | 17 mothers                                                                               | Two quota refugees, seven migrated for own or husband's work, two for husband's study, and six for family reasons, of which one was an asylum seeker entitled to stay | Australia, Bosnia, Burma, Colombia, Estonia, Hungary, India, Iraq, Russia, Thailand, Uganda, Vietnam | B |
| Willey et al [66]. "If you don't ask... you don't tell": Refugee women's                                              | 2019 | Australia (high) | Sub-urban; facility              | Phenomenological study               | 22 women                                                                                 | 17 women with refugee backgrounds and 5 migrant women                                                                                                                 | Afghanistan, Burma (refugee background), India, Vietnam                                              | B |

Supplementary tables for paper by Sacks & Brizuela et al. *Immigrant women's and families' views and experiences of routine postnatal care: findings from a Qualitative Evidence Synthesis.*

|                                                                                                                                                                                          |      |                  |                     |                   |                                                     |                    |               |   |
|------------------------------------------------------------------------------------------------------------------------------------------------------------------------------------------|------|------------------|---------------------|-------------------|-----------------------------------------------------|--------------------|---------------|---|
| perspectives on perinatal mental health screening                                                                                                                                        |      |                  |                     |                   |                                                     |                    | (non-refugee) |   |
| Yelland et al [67]. How do Australian maternity and early childhood health services identify and respond to the settlement experience and social context of refugee background families? | 2014 | Australia (high) | Sub-urban; facility | Descriptive study | 16 mothers, 14 fathers, and 34 health professionals | Refugee background | Afghanistan   | B |

Supplementary tables for paper by Sacks & Brizuela et al. *Immigrant women's and families' views and experiences of routine postnatal care: findings from a Qualitative Evidence Synthesis*.
